# Supplementary material for: Preparation of Silicon Oxide-Carbon Composite with Tailored Electrochemical Properties for Anode in Lithium-Ion Batteries
Source: MDPI journal article supplement (doi:10.3390/c9040114), 2023-12-01
Supplement: s1 [file s1]

Archive with 1 entries (1 files):
- carbon-2673527-supplementary.pdf
